# Supplementary material for: Computational study on the optical and NLO properties of donor–acceptor interaction molecules containing a triazolobenzothiadiazole or benzothiadiazole central acceptor core
Source: Royal Society of Chemistry journal article supplement (doi:10.1039/d1nj04538e), 2021-01-01
Supplement: d1nj04538e1.pdf [file d1nj04538e1.pdf]

# Computational study on optical and NLO properties of Donor-Acceptor interaction molecules containing triazolobenzothiadiazole or benzothiadiazole central acceptor core

Lijing Gong,<sup>\*a</sup> Xiangyu Zhang,<sup>a</sup> Cheng Ma<sup>a</sup>  
<sup>a</sup>*Air Force Aviation University, Changchun 130022, China*

## Contents

| Index                                                                                                                                         | Page |
|-----------------------------------------------------------------------------------------------------------------------------------------------|------|
| 1. The contour plots of the HOMO and LUMO for OTTAB and OTTTB using the B3LYP-D3(BJ) and B3LYP functional.....                                | S2   |
| 2. Energy levels and frontier molecular orbital diagram of Pn-2, Py-2, CF3-2 and IC-2.....                                                    | S2   |
| 3. DOS spectra of Pn-2, Py-2, CF3-2 and IC-2.....                                                                                             | S2   |
| 4. Molecular orbital isosurfaces involved in the main electron transitions of Pn-2, Py-2, CF3-2 and IC-2.....                                 | S3   |
| 5. The selected bond lengths, the HOMO/LUMO energy level and energy gap for OTTAB and OTTTB using the B3LYP-D3(BJ) and B3LYP functionals..... | S3   |
| 6. The calculated $\beta_{\text{HRS}}$ values of the OTTAB, OTTTB, Pn-1, Py-1, CF3-1 and IC-1 by using different functionals .....            | S4   |

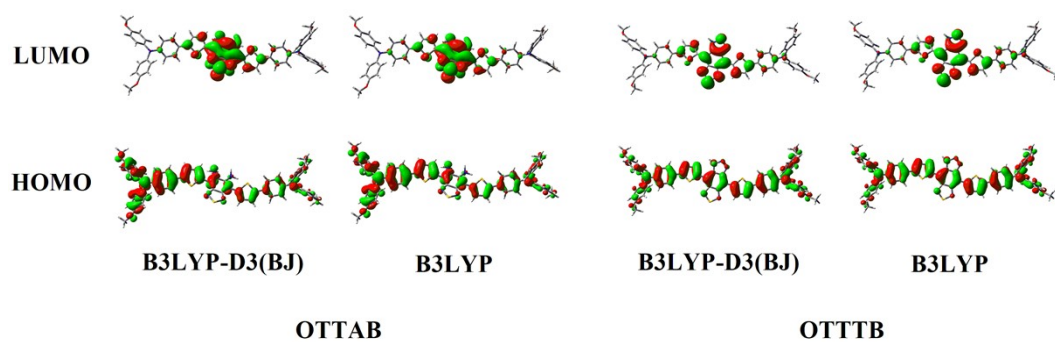

**Fig.S1** The contour plots of the HOMO and LUMO for OTTAB and OTTTB using the B3LYP-D3(BJ) and B3LYP functionals.

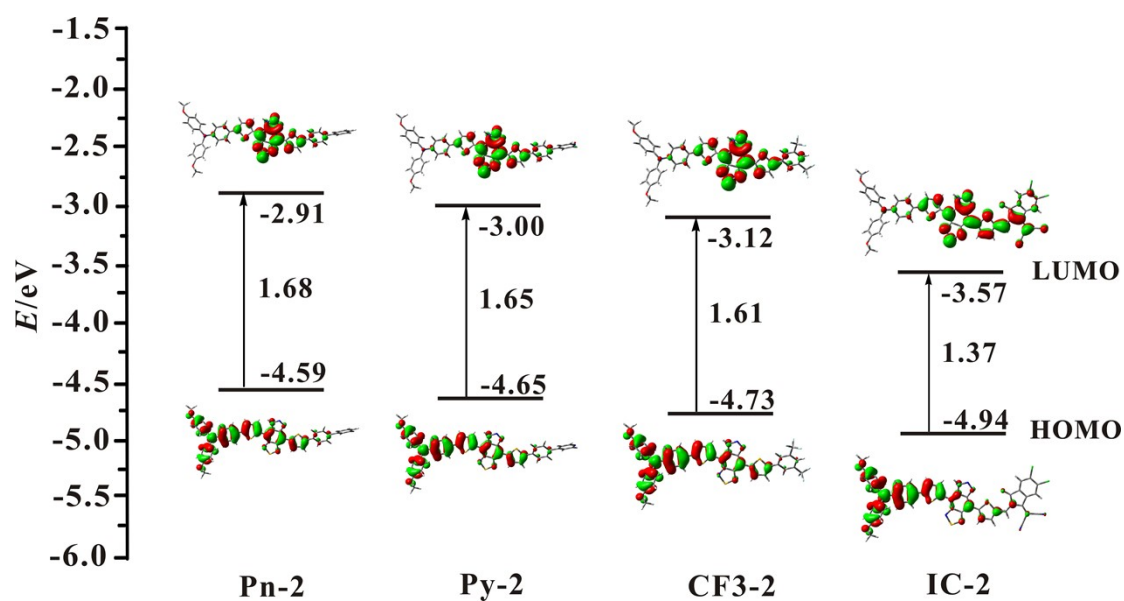

**Fig. S2.** Energy levels and frontier molecular orbital diagram of Pn-2, Py-2, CF3-2 and IC-2

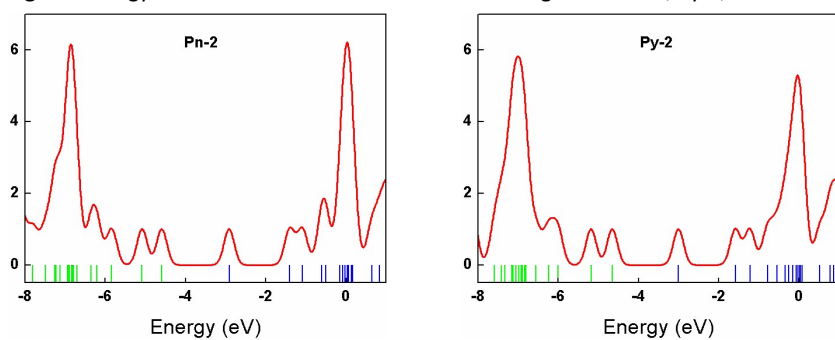

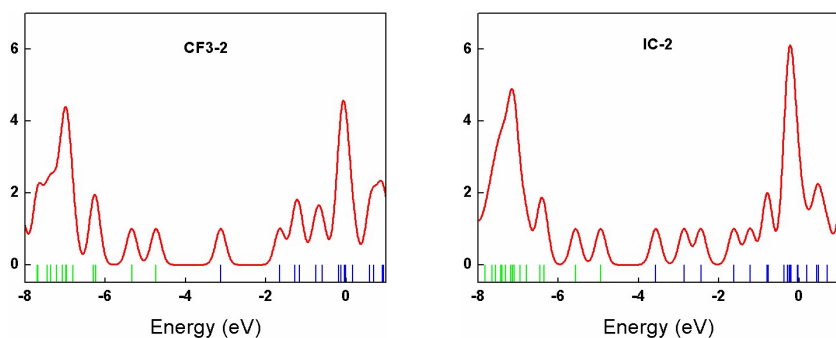

**Fig. S3.** DOS spectra of Pn-2, Py-2, CF3-2 and IC-2

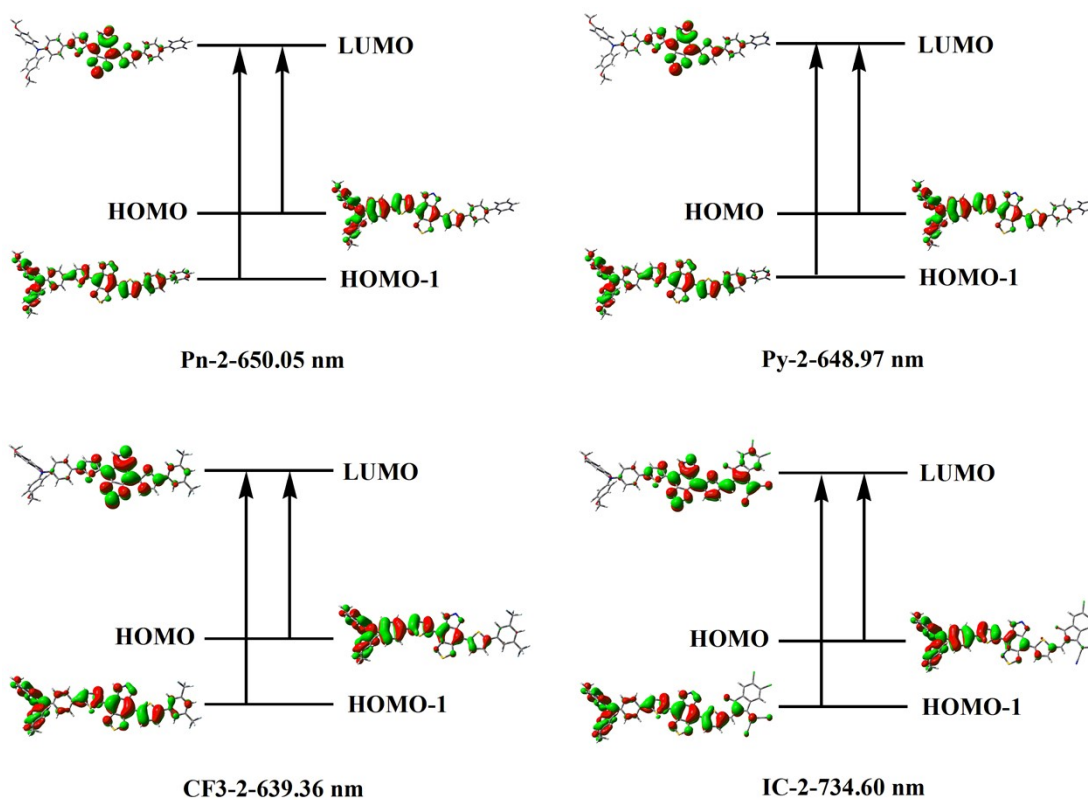

**Fig. S4.** Molecular orbital isosurfaces involved in the main electron transitions of Pn-2, Py-2, CF3-2 and IC-2 at the CAM-B3LYP/6-31+G(d) level of theory.

**Table S1** The selected bond lengths, the HOMO/LUMO energy level and energy gap ( $E_g$ ) for OTTAB and OTTTB using the B3LYP-D3(BJ) and B3LYP functional.

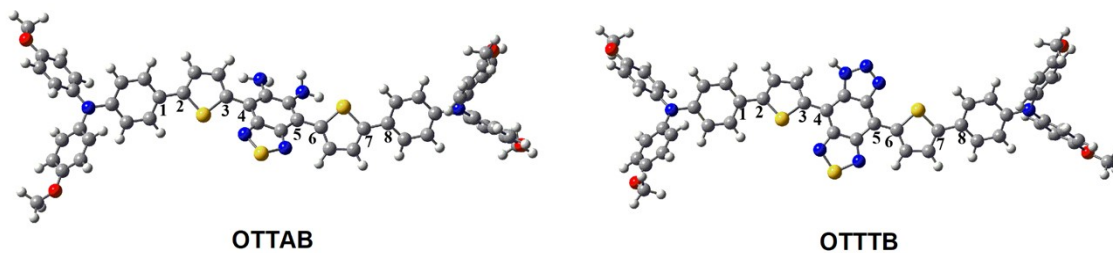

Schematic diagram of chemical structure of OTTAB and OTTTB.

(a)

| OTTAB | C1-C2 | C3-C4 | C5-C6 | C7-C8 | HOMO | LUMO | $E_g$ |
|-------|-------|-------|-------|-------|------|------|-------|
|-------|-------|-------|-------|-------|------|------|-------|

|              |       |       |       |       |       |       |      |
|--------------|-------|-------|-------|-------|-------|-------|------|
| B3LYP-D3(BJ) | 1.460 | 1.459 | 1.463 | 1.460 | -4.44 | -1.92 | 2.52 |
| B3LYP        | 1.463 | 1.464 | 1.468 | 1.468 | -4.48 | -1.89 | 2.59 |
| <b>(b)</b>   |       |       |       |       |       |       |      |
| OTTTB        | C1-C2 | C3-C4 | C5-C6 | C7-C8 | HOMO  | LUMO  | Eg   |
| B3LYP-D3(BJ) | 1.458 | 1.445 | 1.437 | 1.456 | -4.39 | -2.76 | 1.63 |
| B3LYP        | 1.462 | 1.450 | 1.441 | 1.459 | -4.42 | -2.75 | 1.67 |

**Table S2.** The calculated  $\beta_{\text{HRS}}$  values ( $\times 10^{-30}$  esu) of the OTTAB, OTTTB, Pn-1, Py-1, CF3-1 and IC-1 by using different functionals associated with the 6-31+G(d) basis set.

| Derivative | B3LYP   | CAM-B3LYP | BHandHLYP | LC-BLYP | CAM-B3LYP (THF) |
|------------|---------|-----------|-----------|---------|-----------------|
| OTTAB      | 36.31   | 14.69     | 16.23     | 9.28    | 21.91           |
| OTTTB      | 141.45  | 98.48     | 90.63     | 69.42   | 171.95          |
| Ph-1       | 606.39  | 221.49    | 229.33    | 125.77  | 376.22          |
| Py-1       | 729.38  | 269.01    | 282.87    | 152.36  | 448.73          |
| CF3-1      | 776.32  | 311.34    | 327.57    | 180.69  | 537.00          |
| IC-1       | 1827.02 | 866.01    | 874.80    | 568.865 | 2064.45         |
